# Supplementary material for: Periconceptional alcohol exposure causes female-specific perturbations to trophoblast differentiation and placental formation in the rat
Source: Oxford University Press journal article supplement (doi:10.1242/dev.172205), 2019-06-01
Supplement: dev172205supp.pdf [file dev172205supp.pdf]

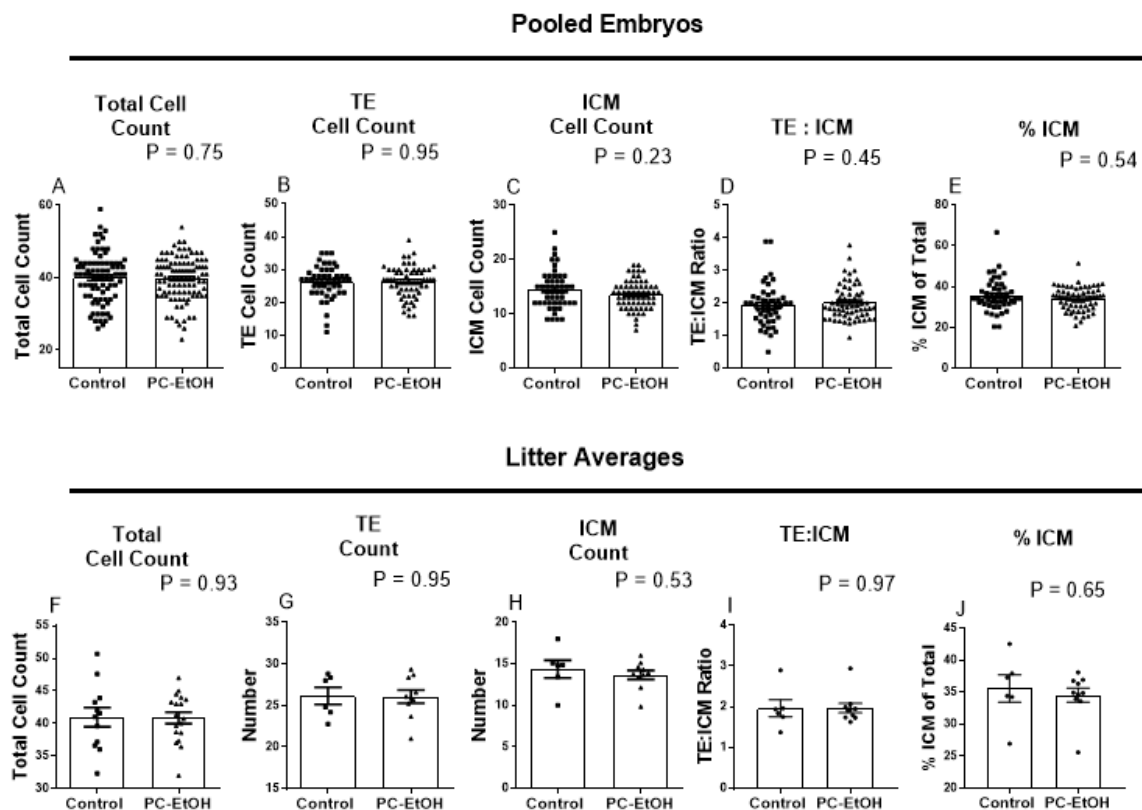

**Figure S1. *In vivo* PC-EtOH exposure does not alter cell counts of E5 blastocyst.**

(A) Total cell count. (B) Trophectoderm (TE) cell count. (C) Inner cell mass (ICM) count. (D) Ratio of trophectoderm to inner cell mass (TE:ICM). (E) Percentage inner cell mass count of total cell count (% ICM). Litter averages were assessed for (F) Total cell count, (G) TE count, (H) ICM count, (I) TE:ICM and (J) % ICM. All data are presented as mean  $\pm$  SEM and analysed with student's *t* tests. Non-parametric Mann-Whitney tests were used on ICM and %ICM pooled groups due to unequal variances. Total cell counts in panel (A) and (F) contain 12-18 dams per treatment, with 82-106 embryos. Panels (B-E) and (G-J) have 6-10 dams per treatment, with 49-62 embryos.

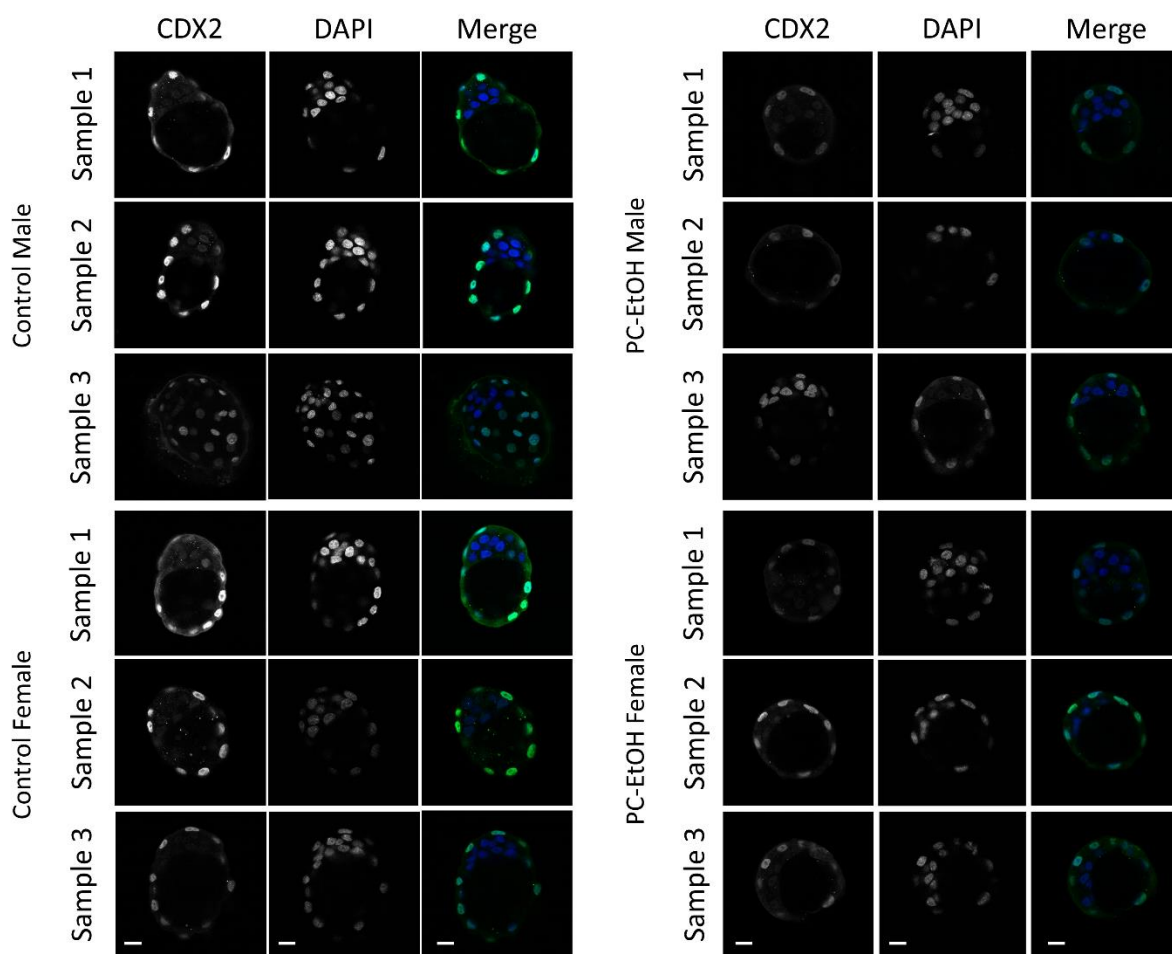

**Figure S2. Representative images of CDX2 immunofluorescence from *in vivo*-derived PC-EtOH exposed embryos at E5. Scale bars: 20um.**

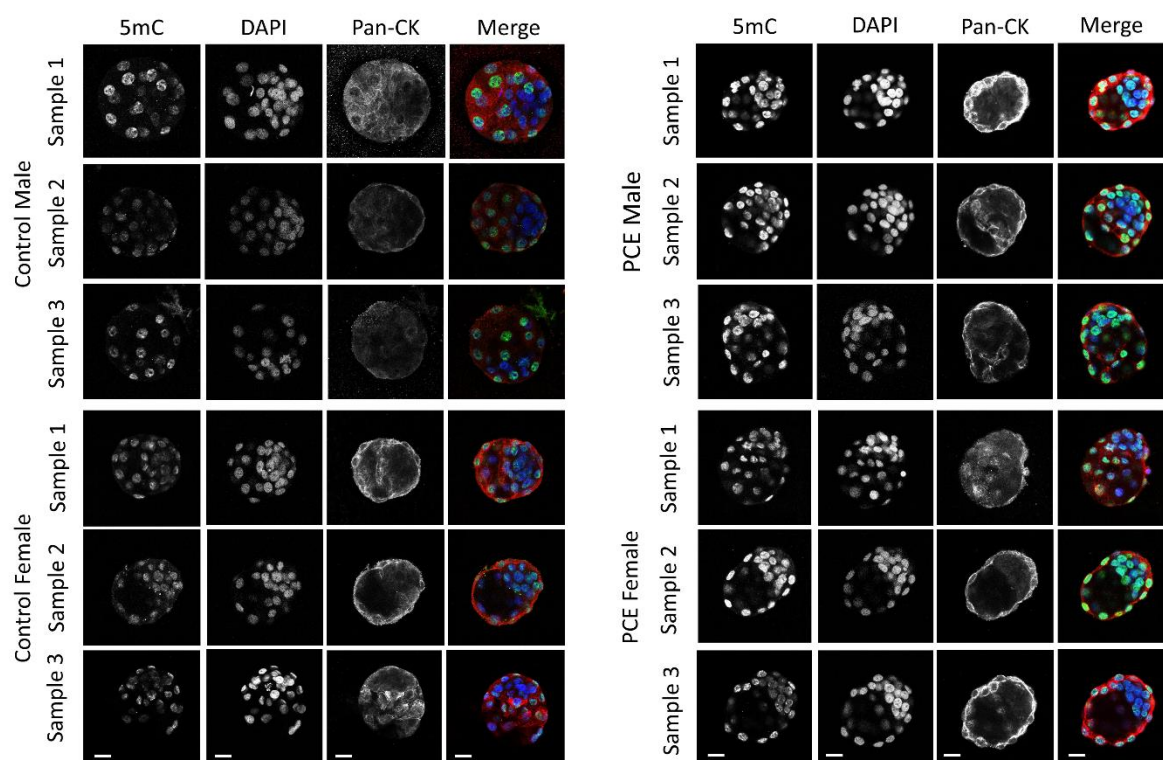

**Figure S3. Representative images of 5mC immunofluorescence from *in vivo*-derived PC-EtOH exposed embryos at E5.** Pan-cytokeratin (Pan-CK) marks trophectodermal cells. Scale bars: 20um.

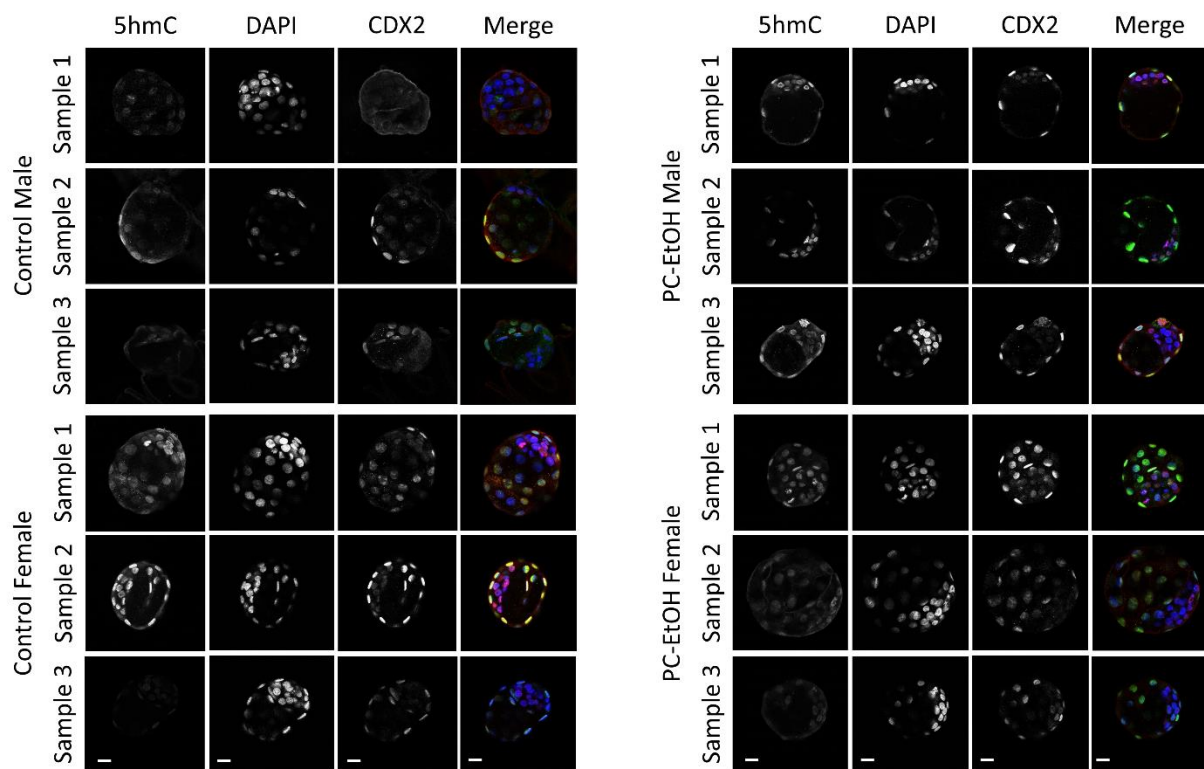

**Figure S4.** Representative images of 5hmC immunofluorescence from *in vivo*-derived PC-EtOH exposed embryos at E5. CDX2 marks trophectodermal cells. Scale bars: 20um.

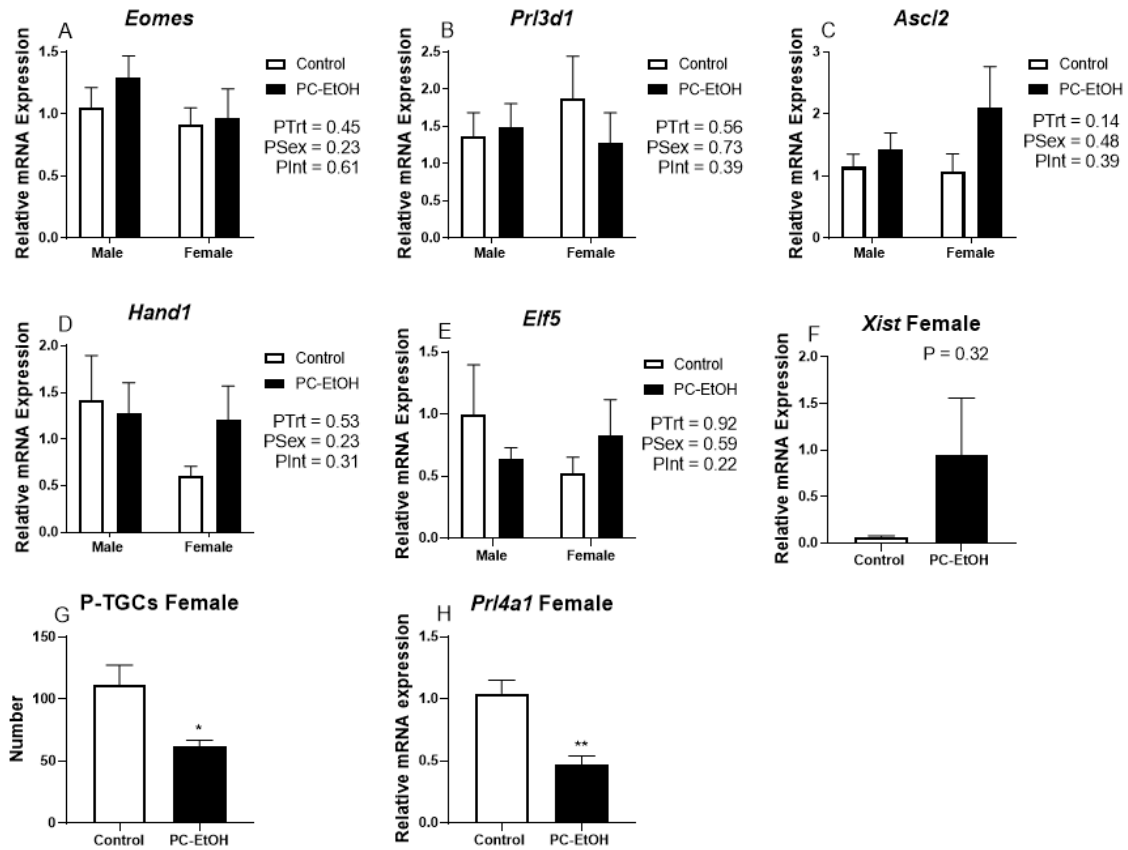

**Figure S5. Gene expression assays and female-specific parameters of trophoblast outgrowths from *in vivo* derived control and PC-EtOH derived embryos.** All data are presented as mean  $\pm$  SEM. Panels (A-E) were analysed by two-way ANOVA. Panel (F) was analysed by a non-parametric Mann Whitney test, while (G and H) were analysed by Students t tests. (A-F and H)  $n = 7-10$ /sex from 3-4 litters/treatment. Panel (G),  $n = 6-11$  per sex from 4 litters/treatment. Gene expression is relative to control male group (A-E) or control female group (F), and standardised to a geometric mean of 2 housekeepers (*18S* and *Rpl13a*). Gene expression assays were carried out in duplicate. Control (white bars), PC-EtOH (black bars). \* $P < 0.05$ , \*\* $P < 0.01$ .

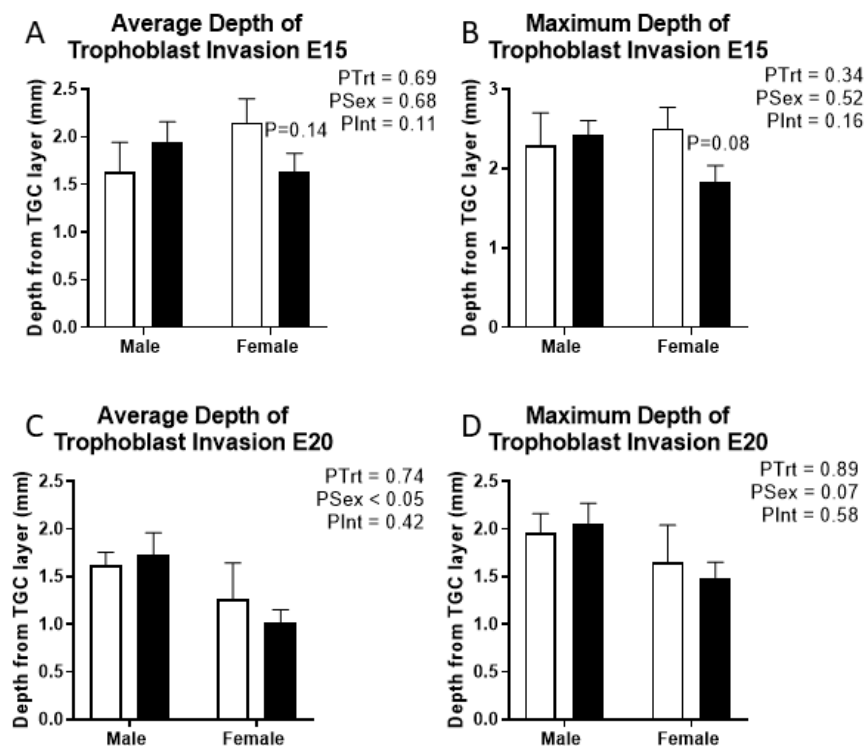

**Figure S6. PC-EtOH does not alter trophoblast invasion depth.** Data shows mean  $\pm$  SEM, analysed by two-way ANOVA. \* $P < 0.05$ . Control (white bars), PC-EtOH (black bars). E15;  $n = 5-8$ / sex from 5-7 litters per treatment, E20;  $n = 3-6$ / sex from 3-4 litters per treatment.

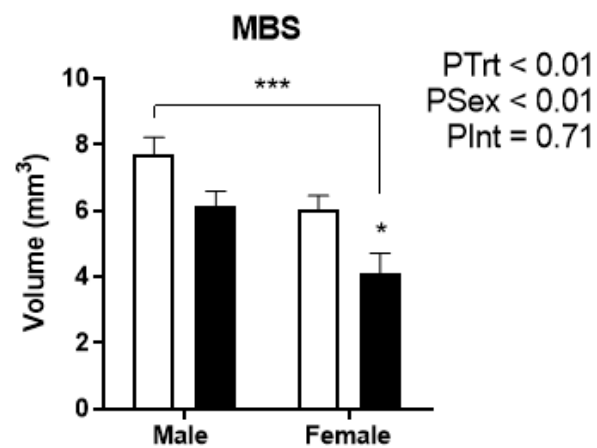

**Figure S7. PC-EtOH causes reduced MBS volume in both sexes.** Data shows mean  $\pm$  SEM, analysed by two-way ANOVA. \* $P < 0.05$ . Control (white bars), PC-EtOH (black bars). E15;  $n = 7-9/\text{sex}$ , 5-7 litters/treatment.

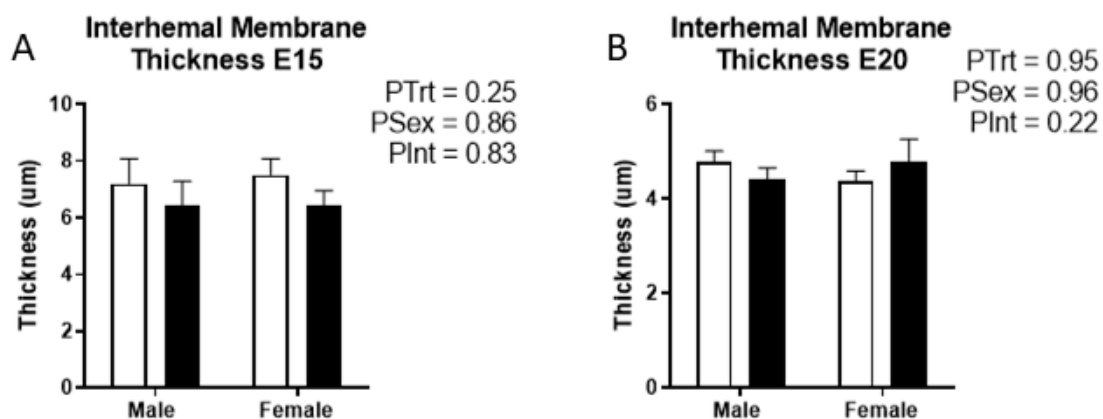

**Figure S8. PC-EtOH does not alter interhaemal membrane thickness.** Thickness of the interhemal membrane was assessed in ImageJ at E15 (A) and E20 (B). Data shows mean  $\pm$  SEM, analysed by two-way ANOVA. \* $P < 0.05$ . Control (white bars), PC-EtOH (black bars). E15;  $n = 4-6$ /sex from 3-4 litters/treatment, E20;  $n = 3-5$ /sex from 3-4 litters/treatment.



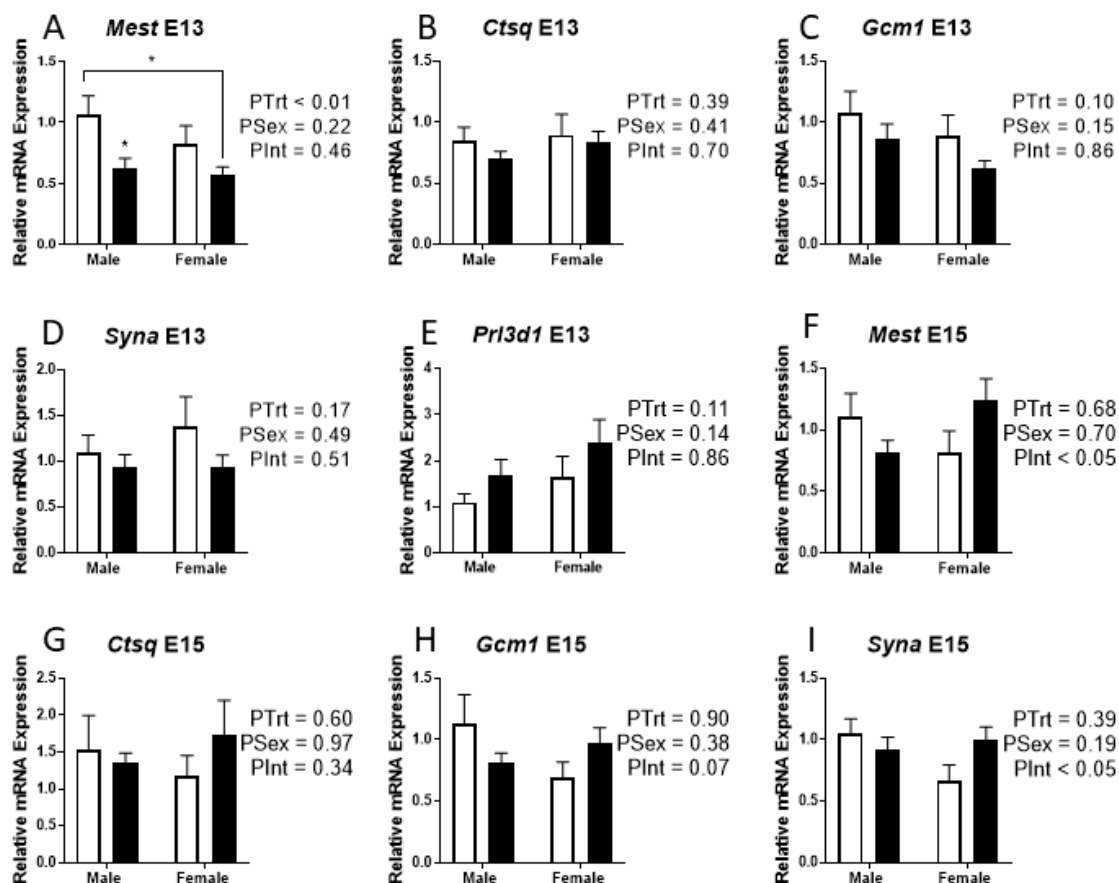

**Figure S9. Expression profiles of gene markers of placental differentiation in E13 whole placenta and the E15 labyrinth.** *Mest* (fetal endothelial cells) at E13 (A) and E15 (F). *Ctsq* (sinusoidal trophoblast giant cells) at E13 (B) and E15 (G). *Gcm1* (syncytiotrophoblast layer II) at E13 (C) and E15 (H), *Syna* (syncytiotrophoblast layer I) at E13 (D) and E15 (I). *Prl3d1* (parietal trophoblast giant cells) at E13 (E). Data shows mean  $\pm$  SEM, analysed by two-way ANOVA. \* $P < 0.05$ . Control (white bars), PC-EtOH (black bars). E13;  $n = 7-8$ /sex from 4-5 litters/treatment,  $n = 7-8$ /sex from 7-8 litters/treatment, expression data is relative to the geometric mean of *18S* and *Rpl13a*, and standardised to average expression of the control male group for each age.

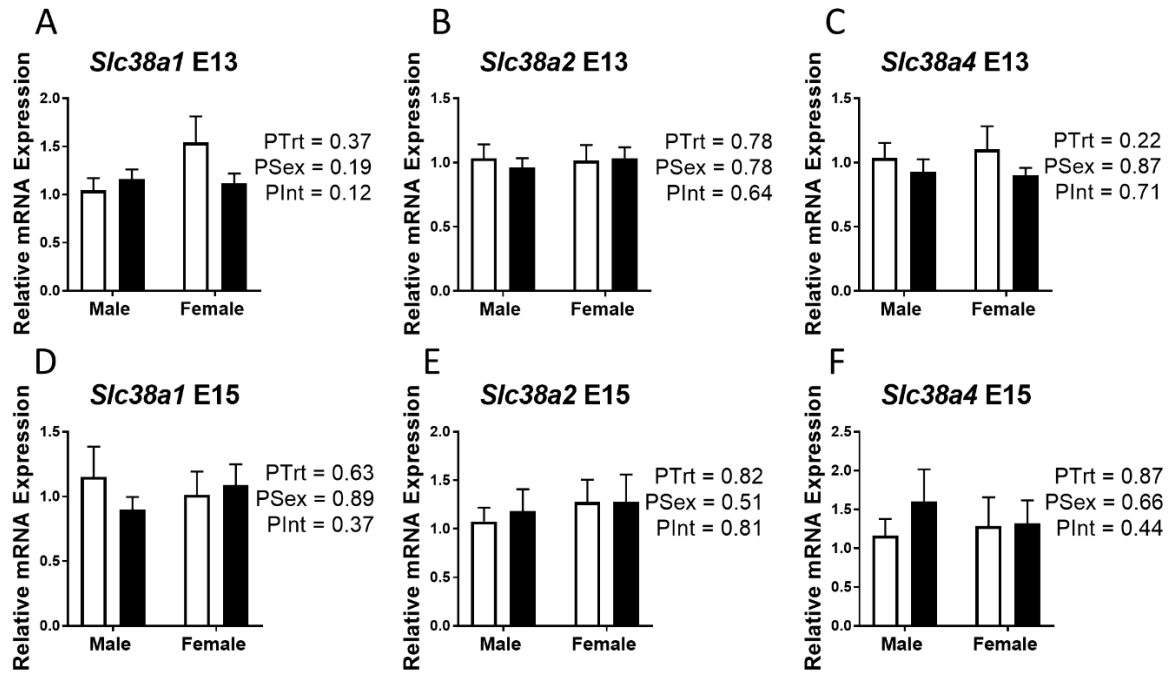

**Figure S10.** PC-EtOH does not alter placental system A amino acid transporter expression. Expression of nutrient transporters were assessed in the E13 whole placenta and E15 labyrinth. System A amino acid transporters - *Slc38a1*, *Slc38a2*, and *Slc38a4* were assessed at E13 (A-C) and E15 (D-F). Data shows mean  $\pm$  SEM, analysed by two-way ANOVA. Control (white bars), PC-EtOH (black bars). Expression assays (A-J) E13;  $n = 7$ -8/sex from 4-5 litters/treatment,  $n = 7$ -8/sex from 7-8 litters/treatment, expression data is relative to the geometric mean of *18S* and *Rpl13a*, and standardised to average expression of the control male group for each age.

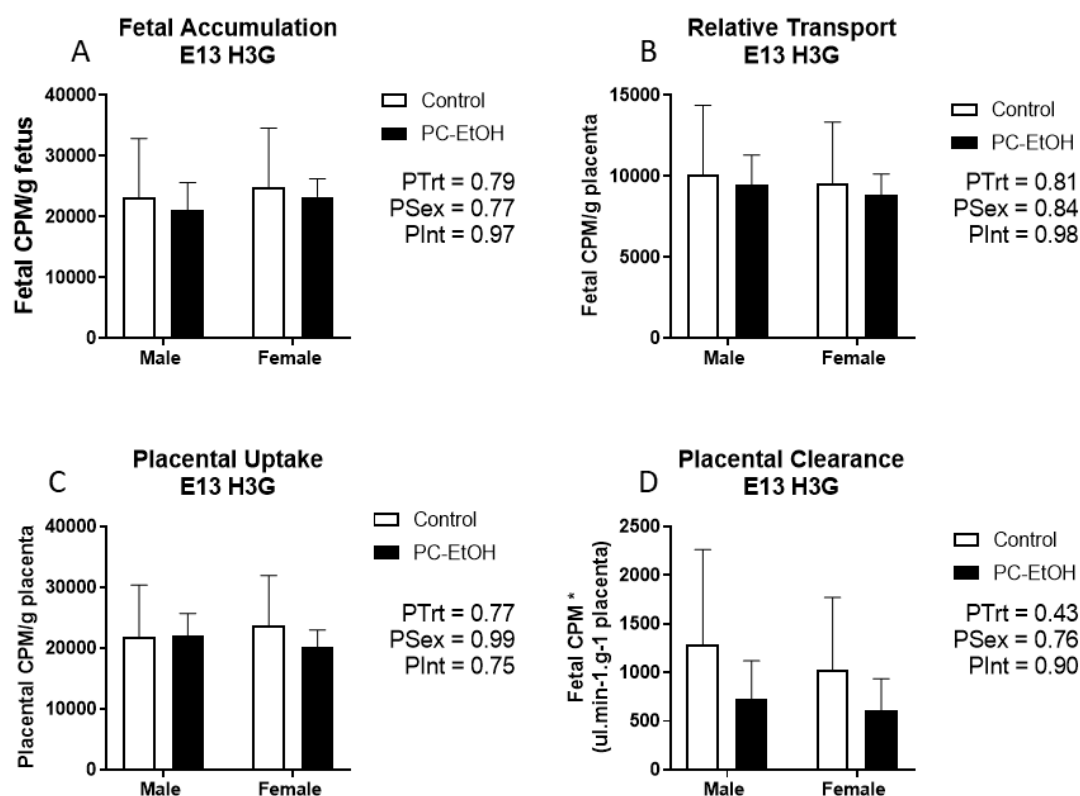

**Figure S11. Quantification of placental glucose transport at E13 after PC-EtOH.**

Total glucose was assessed using glucose analogue H3-O-methyl-D-glucose (H3G) at E13. Assays assessed fetal accumulation (fetal CPM/g fetus, A), relative placental transport (fetal CPM/g placenta, B), placental uptake (placental CPM/g placenta, C), and placental clearance (fetal CPM \* ul.min<sup>-1</sup>.g<sup>-1</sup> placenta, D). Data shows mean  $\pm$  SEM, analysed by two-way ANOVA. Control (white bars), PC-EtOH (black bars).  $n = 18-29$  from 3-4 litters per treatment.

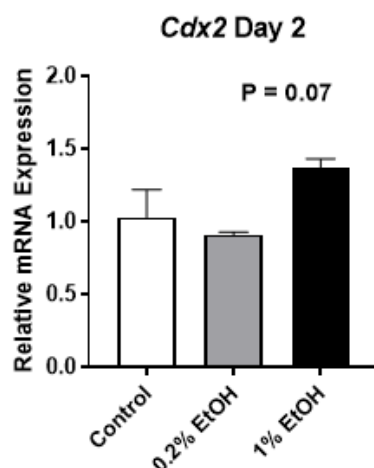

**Figure S12. *Cdx2* expression assays from cultures of mouse trophoblast stem cells at 2 days of differentiation.** Control (white bars), 0.2% EtOH (grey bars), 1% EtOH (black bars). All data analysed by one-way ANOVA with Tukey's post-hoc tests. All data represented by mean  $\pm$  SEM.  $n = 3$  per treatment.

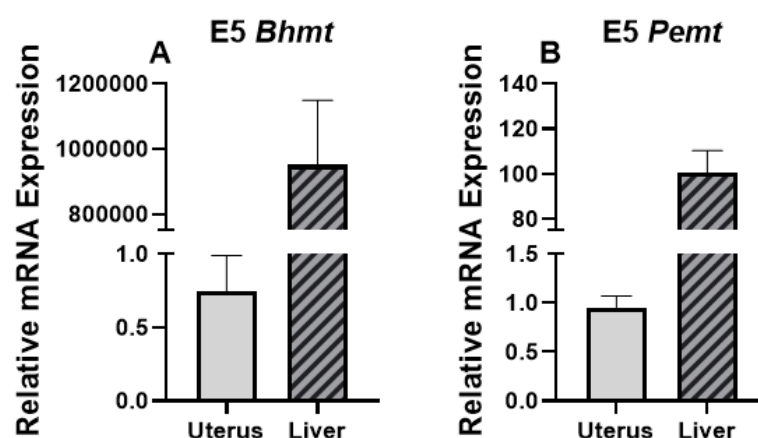

**Figure S13. Comparison of choline metabolism genes in the uterus and liver at E5.** Expression was assessed for *Bhmt* (A) and *Pemt* (B) in uterus (grey bars) and liver samples (striped bars). All data are presented as mean  $\pm$  SEM. For gene expression assays,  $n = 6/\text{treatment}$  (E5 uterus) and  $n = 8/\text{treatment}$  (E5 livers) from 6-8 litters per treatment. Expression is relative to control group at E5, and standardised to geometric mean of *Rpl19* and *B-actin*.

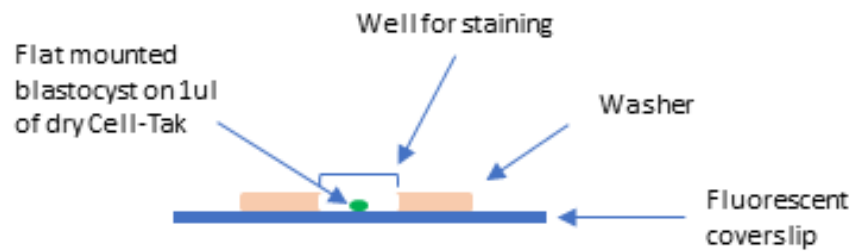

**Figure S14. Staining chambers for immunofluorescent analysis of blastocysts.**

Fluorescent coverslips were attached to washers with paraffin wax and cooled to room temperature. 1ul of Cell-Tak was applied to the centre of the chamber. When dry, the blastocyst was placed onto this area with minimal volume of PBS. The blastocyst can be seen flattening at this stage. The well is subsequently flooded with PBS and staining procedures can continue.

| Treatment      | Aberrant         | Oocytes          | Morulae         | Blastocysts     | Average Blastocysts / Litter | Average Embryos/ Litter |
|----------------|------------------|------------------|-----------------|-----------------|------------------------------|-------------------------|
| Control        | 15/274<br>(5.6%) | 13/274<br>(4.8%) | 1/274 (0.4%)    | 240/274 (89.2%) | 10.91 ± 0.74                 | 12.46 ± 0.91            |
| PC-EtOH        | 8/285<br>(2.8%)  | 4/285<br>(1.4%)  | 2/285 (0.7%)    | 271/285 (95.1%) | 10.54 ± 0.68                 | 10.96 ± 0.67            |
| <i>P Value</i> | <i>P</i> = 0.38  | <i>P</i> < 0.05  | <i>P</i> = 0.64 | <i>P</i> = 0.70 |                              | <i>P</i> = 0.18         |

**Table S1. Pre-implantation embryos derived from uterine flushings of E5 mothers.** Aberrant counts do not include 2- and 4-cell embryos. Data was analysed using student's t tests. Non-parametric Mann-Whitney tests were used on oocytes and aberrant groups due to unequal variances. *n* = 22-33 litters/treatment. Data presented as percentages or mean ± SEM.

|                                    | E5          |             |                 | E7          |             |                 | Two-way ANOVA      |                      |                    |
|------------------------------------|-------------|-------------|-----------------|-------------|-------------|-----------------|--------------------|----------------------|--------------------|
|                                    | Control     | PC-EtOH     | Statistics      | Control     | PC-EtOH     | Statistics      | PTrt               | PAGE                 | Plnt               |
| <b>Estrogen response genes</b>     |             |             |                 |             |             |                 |                    |                      |                    |
| <i>Esr2</i>                        | 1.13 ± 0.19 | 1.78 ± 0.33 | <i>P</i> = 0.12 | 7.52 ± 1.04 | 5.29 ± 0.82 | <i>P</i> = 0.11 | <i>PTrt</i> = 0.38 | <i>PAGE</i> < 0.0001 | <i>Plnt</i> = 0.11 |
| <i>Muc1</i>                        | 1.04 ± 0.14 | 0.69 ± 0.21 | <i>P</i> = 0.18 | 0.33 ± 0.07 | 0.50 ± 0.10 | <i>P</i> = 0.22 | <i>PTrt</i> = 0.45 | <i>PAGE</i> < 0.001  | <i>Plnt</i> < 0.05 |
| <i>Hbegf</i>                       | 1.13 ± 0.26 | 1.15 ± 0.38 | <i>P</i> = 0.78 | 0.15 ± 0.02 | 0.23 ± 0.03 | <i>P</i> = 0.07 | <i>PTrt</i> = 0.43 | <i>PAGE</i> < 0.0001 | <i>Plnt</i> = 0.99 |
| <i>Vegfa</i>                       | 1.04 ± 0.14 | 0.86 ± 0.20 | <i>P</i> = 0.47 | 0.96 ± 0.08 | 1.04 ± 0.10 | <i>P</i> = 0.51 | <i>PTrt</i> = 0.69 | <i>PAGE</i> = 0.70   | <i>Plnt</i> = 0.29 |
| <i>Fgf2</i>                        | 1.05 ± 0.14 | 0.84 ± 0.05 | <i>P</i> = 0.31 | 0.73 ± 0.09 | 0.63 ± 0.05 | <i>P</i> = 0.37 | <i>PTrt</i> = 0.09 | <i>PAGE</i> < 0.01   | <i>Plnt</i> = 0.53 |
| <i>Fgf9</i>                        | 1.05 ± 0.13 | 1.45 ± 0.46 | <i>P</i> = 0.93 | 0.37 ± 0.03 | 0.34 ± 0.07 | <i>P</i> = 0.32 | <i>PTrt</i> = 0.26 | <i>PAGE</i> < 0.001  | <i>Plnt</i> = 0.20 |
| <i>Lif</i>                         | 1.20 ± 0.33 | 1.34 ± 0.42 | <i>P</i> = 0.79 | -           | -           | -               | -                  | -                    | -                  |
| <i>Usag1</i>                       | 1.01 ± 0.29 | 0.55 ± 0.14 | <i>P</i> = 0.19 | 0.18 ± 0.02 | 0.22 ± 0.03 | <i>P</i> = 0.34 | <i>PTrt</i> = 0.07 | <i>PAGE</i> < 0.0001 | <i>Plnt</i> < 0.05 |
| <i>Ncoa6</i>                       | 1.05 ± 0.15 | 0.91 ± 0.25 | <i>P</i> = 0.63 | 0.81 ± 0.10 | 0.75 ± 0.11 | <i>P</i> = 0.67 | <i>PTrt</i> = 0.48 | <i>PAGE</i> = 0.18   | <i>Plnt</i> = 0.78 |
| <b>Progesterone response genes</b> |             |             |                 |             |             |                 |                    |                      |                    |
| <i>lhh</i>                         | 1.24 ± 0.36 | 1.29 ± 0.51 | <i>P</i> = 0.17 | 0.09 ± 0.01 | 0.22 ± 0.06 | <i>P</i> = 0.32 | <i>PTrt</i> = 0.69 | <i>PAGE</i> < 0.0001 | <i>Plnt</i> = 0.87 |
| <i>Areg</i>                        | 1.73 ± 1.01 | 2.16 ± 0.89 | <i>P</i> = 0.42 | -           | -           | -               | -                  | -                    | -                  |
| <i>Hand2</i>                       | 1.03 ± 0.11 | 0.96 ± 0.11 | <i>P</i> = 0.66 | 6.92 ± 0.49 | 6.71 ± 0.62 | <i>P</i> = 0.79 | <i>PTrt</i> = 0.78 | <i>PAGE</i> < 0.0001 | <i>Plnt</i> = 0.89 |
| <i>lgfbp1</i>                      | 1.35 ± 0.31 | 1.22 ± 0.57 | <i>P</i> = 0.84 | 3.89 ± 0.70 | 2.83 ± 0.38 | <i>P</i> = 0.20 | <i>PTrt</i> = 0.32 | <i>PAGE</i> < 0.01   | <i>Plnt</i> = 0.44 |
| <b>dNK cell function genes</b>     |             |             |                 |             |             |                 |                    |                      |                    |
| <i>Prf1</i>                        | -           | -           | -               | 1.18 ± 0.19 | 1.04 ± 0.27 | <i>P</i> = 0.66 | -                  | -                    | -                  |
| <b>Others</b>                      |             |             |                 |             |             |                 |                    |                      |                    |
| <i>Cnr1</i>                        | -           | -           | -               | 1.14 ± 0.21 | 0.74 ± 0.09 | <i>P</i> = 0.09 | -                  | -                    | -                  |
| <i>Klf5</i>                        | -           | -           | -               | 0.96 ± 0.15 | 1.94 ± 0.36 | <i>P</i> < 0.05 | -                  | -                    | -                  |
| <i>Cyp26a1</i>                     | 1.17 ± 0.25 | 1.34 ± 0.44 | <i>P</i> = 0.74 | 6.38 ± 1.11 | 8.02 ± 0.77 | <i>P</i> = 0.24 | <i>PTrt</i> = 0.34 | <i>PAGE</i> < 0.0001 | <i>Plnt</i> = 0.44 |

**Table S2. Expression of uterine genes during receptivity (E5) and post-implantation (E7) decidualisation.** All data are presented as mean ± SEM and analysed by two-way ANOVA. Due to significant differences in age, treatments were analysed at each gestational age with Student's *t* tests. *n* = 6/treatment (E5) and *n* = 10/treatment (E7) from 5-7 litters per treatment. Gene expression is relative to control group at E5, and standardised to geometric mean of *Rpl19* and *B-actin*.



|                       | Control        |                | PC-EtOH        |                |                                                                                        |
|-----------------------|----------------|----------------|----------------|----------------|----------------------------------------------------------------------------------------|
| Variables             | Male           | Female         | Male           | Female         | Statistics                                                                             |
| Fetus (mg)            | 38.385 ± 2.592 | 34.957 ± 2.283 | 40.011 ± 3.158 | 35.263 ± 1.427 | <i>PTrt</i> = 0.70<br><i>P</i> <sub>Sex</sub> = 0.12<br><i>P</i> <sub>Int</sub> = 0.79 |
| Placenta (mg)         | 92.274 ± 4.070 | 86.704 ± 2.817 | 88.015 ± 5.817 | 86.439 ± 6.205 | <i>PTrt</i> = 0.65<br><i>P</i> <sub>Sex</sub> = 0.48<br><i>P</i> <sub>Int</sub> = 0.69 |
| PW:BW ratio (mg/mgbw) | 2.417 ± 0.068  | 2.499 ± 0.107  | 2.218 ± 0.132  | 2.487 ± 0.297  | <i>PTrt</i> = 0.55<br><i>P</i> <sub>Sex</sub> = 0.33<br><i>P</i> <sub>Int</sub> = 0.60 |
|                       | Control        |                | PC-EtOH        |                | Statistics                                                                             |
| Litter size (number)  | 15.73 ± 0.384  |                | 14.20 ± 0.389  |                | <i>P</i> < 0.05                                                                        |
| Resorptions (number)  | 0.636 ± 0.244  |                | 0.800 ± 0.200  |                | <i>P</i> = 0.61                                                                        |
| Sex Ratio (M:F)       | 1.038 ± 0.177  |                | 1.057 ± 0.194  |                | <i>P</i> = 0.95                                                                        |
| Male Fetuses (%)      | 48.62 ± 3.121  |                | 48.59 ± 4.194  |                | <i>P</i> = 0.99                                                                        |

**Table S3. Fetal and Placental Biometry at E13.** All data are presented as mean ± SEM and *n* = 5-11/ sex from 4 litters/treatment for fetal and placental weights, and PW (placental weight):BW (body weight) ratio. *n* = 4-11/sex from 8-9 litters/treatment for remaining parameters. Note: litter size includes resorptions. M; male, F; female.

|                                                           | E13             |                 |                 |                 |                                                                 | E20               |                   |                   |                   |                                                                 |
|-----------------------------------------------------------|-----------------|-----------------|-----------------|-----------------|-----------------------------------------------------------------|-------------------|-------------------|-------------------|-------------------|-----------------------------------------------------------------|
|                                                           | Control         |                 | PC-EtOH         |                 |                                                                 | Control           |                   | PC-EtOH           |                   |                                                                 |
| Variables                                                 | Male            | Female          | Male            | Female          | Statistics                                                      | Male              | Female            | Male              | Female            | Statistics                                                      |
| WP Vol<br>E13<br>(mm <sup>3</sup> )                       | 26.78 ±<br>1.42 | 27.57 ±<br>1.48 | 26.08 ±<br>1.82 | 25.49 ±<br>1.82 | <i>PTrt</i> = 0.40<br><i>P</i> Sex = 0.95<br><i>Plnt</i> = 0.68 | 167.56 ±<br>12.06 | 164.78 ±<br>12.49 | 177.71 ±<br>9.06  | 174.51<br>± 7.97  | <i>PTrt</i> = 0.60<br><i>P</i> Sex = 0.78<br><i>Plnt</i> = 0.98 |
| Lab Vol<br>(mm <sup>3</sup> )                             | 3.24 ±<br>0.32  | 3.80 ±<br>0.39  | 3.64 ±<br>0.17  | 3.88 ±<br>0.32  | <i>PTrt</i> = 0.48<br><i>P</i> Sex = 0.23<br><i>Plnt</i> = 0.63 | 119.58 ±<br>9.85  | 121.12 ±<br>9.97  | 128.41 ±<br>6.69  | 119.27<br>± 7.79  | <i>PTrt</i> = 0.70<br><i>P</i> Sex = 0.67<br><i>Plnt</i> = 0.55 |
| JZ Vol<br>(mm <sup>3</sup> )                              | 1.88 ±<br>0.20  | 2.21 ±<br>0.26  | 2.36 ±<br>0.19  | 2.22 ±<br>0.24  | <i>PTrt</i> = 0.29<br><i>P</i> Sex = 0.68<br><i>Plnt</i> = 0.31 | 47.98 ±<br>3.88   | 43.66 ±<br>3.33   | 49.29 ±<br>4.05   | 52.80 ±<br>3.72   | <i>PTrt</i> = 0.17<br><i>P</i> Sex = 0.92<br><i>Plnt</i> = 0.31 |
| Dec Vol<br>(mm <sup>3</sup> )                             | 21.66 ±<br>1.18 | 21.83 ±<br>1.52 | 20.08 ±<br>1.82 | 19.40 ±<br>1.64 | <i>PTrt</i> = 0.20<br><i>P</i> Sex = 0.87<br><i>Plnt</i> = 0.78 | -                 | -                 | -                 | -                 | -                                                               |
| FBS Vol<br>(mm <sup>3</sup> )                             | 0.46 ±<br>0.06  | 0.54 ±<br>0.05  | 0.54 ±<br>0.06  | 0.65 ±<br>0.08  | <i>PTrt</i> = 0.19<br><i>P</i> Sex = 0.15<br><i>Plnt</i> = 0.83 | 20.02 ±<br>1.66   | 19.32 ±<br>1.40   | 22.23 ±<br>1.97   | 18.73 ±<br>1.92   | <i>PTrt</i> = 0.64<br><i>P</i> Sex = 0.23<br><i>Plnt</i> = 0.42 |
| MBS Vol<br>(mm <sup>3</sup> )                             | 0.81 ±<br>0.13  | 1.09 ±<br>0.24  | 0.92 ±<br>0.10  | 1.14 ±<br>0.09  | <i>PTrt</i> = 0.63<br><i>P</i> Sex = 0.13<br><i>Plnt</i> = 0.82 | 46.48 ±<br>4.44   | 39.67 ±<br>3.37   | 41.56 ±<br>3.22   | 39.34 ±<br>3.95   | <i>PTrt</i> = 0.50<br><i>P</i> Sex = 0.23<br><i>Plnt</i> = 0.55 |
| Lab<br>Troph Vol<br>(mm <sup>3</sup> )                    | 1.97 ±<br>0.16  | 2.16 ±<br>0.13  | 2.18 ±<br>0.08  | 2.10 ±<br>0.17  | <i>PTrt</i> = 0.64<br><i>P</i> Sex = 0.72<br><i>Plnt</i> = 0.36 | 53.07 ±<br>5.46   | 62.13 ±<br>5.72   | 64.62 ±<br>5.46   | 61.19 ±<br>3.89   | <i>PTrt</i> = 0.32<br><i>P</i> Sex = 0.59<br><i>Plnt</i> = 0.25 |
| Total SA<br>(FBS +<br>MBS,<br>cm <sup>2</sup> )           | 5.20 ±<br>0.57  | 6.14 ±<br>0.58  | 6.18 ±<br>0.36  | 6.55 ±<br>0.48  | <i>PTrt</i> = 0.20<br><i>P</i> Sex = 0.23<br><i>Plnt</i> = 0.60 | 202.64 ±<br>16.05 | 208.31 ±<br>12.71 | 225.92 ±<br>11.91 | 207.54<br>± 15.06 | <i>PTrt</i> = 0.44<br><i>P</i> Sex = 0.66<br><i>Plnt</i> = 0.40 |
| FBS SA<br>(cm <sup>2</sup> )                              | 2.43 ±<br>0.31  | 2.99 ±<br>0.21  | 3.11 ±<br>0.200 | 3.40 ±<br>0.34  | <i>PTrt</i> = 0.07<br><i>P</i> Sex = 0.15<br><i>Plnt</i> = 0.63 | 78.42 ±<br>6.38   | 84.96 ±<br>4.90   | 96.71 ±<br>5.27   | 84.92 ±<br>7.14   | <i>PTrt</i> = 0.14<br><i>P</i> Sex = 0.67<br><i>Plnt</i> = 0.14 |
| MBS SA<br>(cm <sup>2</sup> )                              | 2.77 ±<br>0.30  | 3.14 ±<br>0.38  | 3.07 ±<br>0.18  | 3.15 ±<br>0.22  | <i>PTrt</i> = 0.61<br><i>P</i> Sex = 0.45<br><i>Plnt</i> = 0.62 | 124.23 ±<br>10.13 | 123.35 ±<br>9.41  | 129.20 ±<br>7.67  | 122.62<br>± 9.02  | <i>PTrt</i> = 0.82<br><i>P</i> Sex = 0.69<br><i>Plnt</i> = 0.76 |
| Lab<br>Weight:<br>Lab Vol<br>(g/mm <sup>3</sup> )<br>x100 | -               | -               | -               | -               | -                                                               | 0.31 ±<br>0.03    | 0.29 ±<br>0.01    | 0.28 ±<br>0.04    | 0.30 ±<br>0.02    | <i>PTrt</i> = 0.93<br><i>P</i> Sex = 0.79<br><i>Plnt</i> = 0.54 |
| JZ<br>Weight:<br>JZ Vol<br>(g/mm <sup>3</sup> )<br>x100   | -               | -               | -               | -               | -                                                               | 0.032 ±<br>0.02   | 0.33<br>±0.05     | 0.34<br>±0.05     | 0.32<br>±0.03     | <i>PTrt</i> = 0.88<br><i>P</i> Sex = 0.98<br><i>Plnt</i> = 0.67 |

**Table S4. Stereological investigation of the placenta at E13 and E20.** All data are presented as mean ± SEM, analysed by two-way ANOVA. E13; *n* = 5-7/sex from 4 litters/treatment, E20; *n* = 6-12/sex from 4-6 litters/treatment. Dec; decidua. FBS; fetal blood space. Lab; labyrinth. Lab Troph; labyrinth trophoblast. JZ; junctional zone. MBS; maternal blood space. SA; surface area. Vol; volume. WP; whole placenta.

| Gene                 | Direction    | Sequence (5'-3')     | Product (bp) |
|----------------------|--------------|----------------------|--------------|
| <i>Mest</i>          | Forward (T3) | CTGCTCTGCACTCATGGAAG | 478          |
|                      | Reverse (T7) | CCGTCTTTGAGGAGCTTTTG |              |
| <i>Prf1</i>          | Forward (T3) | AGCCAGTGTCTCAAGCGAAT | 414          |
|                      | Reverse (T7) | CAGTCCTGGTTGGTGACCTT |              |
| <i>Prl8a2 (dPRP)</i> | Forward (T3) | TGCATCAGTTCCTGCTTGTC | 871          |
|                      | Reverse (T7) | TTTCCCTGTTATGCGACACA |              |

**Table S5. *In situ* hybridisation primers and product length.** T3; AATTAACCCTCACTAAAGGG and T7; TAATACGACTCACTATAGGG sequences were added to the beginning of forward and reverse primers respectively. Note; *Prl8a2* is also known as decidual prolactin-related protein (dPRP).

| Gene                   | Forward Primer                | Reverse Primer                | Primer Efficiency |
|------------------------|-------------------------------|-------------------------------|-------------------|
| <i>Bhmt</i>            | AAG AGG GGA ATC TTA GAA CG    | TTC CAG TGC AAA GAC AAA TC    | 2.151             |
| <i>Rpl13a</i>          | GCA CAA GAC CAA AAG AAG       | CGC TTT TTC TTG TCA TAG GG    | 2.033             |
| <i>RplO</i>            | GAG TGA CAT CGT CTT TAA ACC   | AAG CAT TTT GGG TAG TCA TC    | 2.023             |
| <i>Prl3d1</i>          | AGA CCT TAT ACA ACA GGA CTC   | ATG GCA AAA GAT GAG TGT C     | 1.992             |
| <i>Hand2</i>           | CTC CAA AAT CAA GAC TCT GC    | CAT TCA GCT CTT TCT TCC TC    | 1.963             |
| <i>Ncoa6</i>           | AAA AGA TCT TCT CGA CCT G     | GTA TCA AGT CAT CTT CCT GC    | 1.989             |
| <i>Usag1 (Sostdc1)</i> | ACT GGA TCG AAA TAG TCG AG    | TCC AGT ACT TTG TTC CGT AG    | 1.945             |
| <i>Elf5</i>            | ATT TGT CAG AGA CTT GCT TC    | TTA TAG TAG TAT TCT AGG GCT C | 1.989             |
| <i>Esr1</i>            | ATA TGA TCA ACT GGG CAA AG    | CAT TTA CCT TGA TTC CTG TCC   | 2.021             |
| <i>Pemt</i>            | CTA GGC TGG GCA CTT ATG       | CTT CAA ACA GGA GAG CAA C     | 1.931             |
| <i>Pgr</i>             | TCT AAT CCT GAA TGA GCA GAG   | GAC TTT CAT ACA GAG GAA CTC   | 2.018             |
| <i>Fgf2</i>            | AAA CTC GGA TCC AAA ACG       | TGT CTA AAG AGA GTC AGC TC    | 1.998             |
| <i>Fgf9</i>            | ACT ATA AAT GCT TCA TGC GG    | CAA TAA ATC AAG CAA GTG GC    | 1.960             |
| <i>Igf1bp-1</i>        | AAA CTG AAA GTT GTT TCC TCC   | ATA CAA ACC CAC TTG TAC ATC   | 1.969             |
| <i>Cyp26a1</i>         | CAA GCA GCG AAA GAA GGT GA    | CTT CAG CAA TCA CTG GCA CG    | 1.940             |
| <i>Cnr1 (CB1)</i>      | CAC CCA TGG CTG AGG GTT CC    | CCC ACG TAG AGG AGG TCT GT    | 1.985             |
| <i>Klf5</i>            | AAT CCA AAT TTA CCT GCC AC    | TGC AAC CAT CAT AAT CAC AG    | 1.909             |
| <i>Ihh</i>             | AAA GAC GAG GAG AAC ACC       | AAGATTCCTCTGAGTGATGG          | 1.924             |
| <i>Muc1</i>            | CGG AAG TCA ATG TGA ATG AG    | CAA AAT ACA GAC CAG TAC CAG   | 1.955             |
| <i>Xist</i>            | CCT ACC TGT AAT ACA CAA TGC C | GGT CGT ATG TAA AGC TGG C     | 2.055             |
| <i>Hprt</i>            | ACT GGT AAA ACA ATG CAG AC    | CCT GAA GTG CTC ATT ATA GTC   | 2.066             |

**Table S6. SYBR primer sequences and efficiencies.** All probes are designed for the rat unless otherwise stated.

| <b>Gene of Interest</b> | <b>ID #</b>   |
|-------------------------|---------------|
| <i>18S</i>              | 4333760F      |
| <i>Ascl2</i>            | Rn00580387_m1 |
| <i>Areg</i>             | Rn00567471_m1 |
| <i>Bmp2</i>             | Rn00567818_m1 |
| <i>Cited1</i>           | Rn00821880_g1 |
| <i>Ctl1 (SLC44a1)</i>   | Rn00585181_m1 |
| <i>Ctl2 (SLC44a2)</i>   | Rn01486877_m1 |
| <i>Ctsq</i>             | Rn01448613_m1 |
| <i>Eomes</i>            | Rn01746545_m1 |
| <i>G6pd</i>             | Rn00566576_m1 |
| <i>Gcm1</i>             | Rn00820824_g1 |
| <i>Glut1 (Slc2a1)</i>   | Rn01417099_m1 |
| <i>Glut3 (Slc2a3)</i>   | Rn00567331    |
| <i>Hand1</i>            | Rn00572139_m1 |
| <i>Hbegf</i>            | Rn01405658_m1 |

| <b>Gene of Interest</b>  | <b>ID #</b>   |
|--------------------------|---------------|
| <i>Igf2</i>              | Rn01454518_m1 |
| <i>Igf2r</i>             | Rn01636937_m1 |
| <i>Lif</i>               | Rn00573491_g1 |
| <i>Mest</i>              | Rn01500324_m1 |
| <i>Ogt</i>               | Rn00820779_m1 |
| <i>Prf1</i>              | Rn00569095_m1 |
| <i>Prl4a1</i>            | Rn00566830_m1 |
| <i>Nr2f2 (CoupTF-II)</i> | Rn00756179_m1 |
| <i>Rlim</i>              | Rn01473927_m1 |
| <i>Rpl19</i>             | Rn00821265_g1 |
| <i>Sry</i>               | Rn04224592_u1 |
| <i>Syna</i>              | Rn01500024_m1 |
| <i>Slc38a1 (Snat1)</i>   | Rn00593696_m1 |
| <i>Slc38a2 (Snat2)</i>   | Mn00628416_m1 |
| <i>Slc38a4 (Snat4)</i>   | Rn00593742_m1 |

Table S7. Taqman Primer information.
